# Supplementary material for: Phosphorylation and Methylation of Proteasomal Proteins of the HaloarcheonHaloferax volcanii
Source: Hindawi journal article supplement (doi:10.1155/2010/481725), 2010-01-01

**Suppl. Table 1.** Strains and Plasmids used in this study.

| Strain or plasmid         | Phenotype, genotype, description, and/or PCR Primers <sup>1</sup>                                                                                                                                                                           | Source or reference(s) <sup>2</sup> |
|---------------------------|---------------------------------------------------------------------------------------------------------------------------------------------------------------------------------------------------------------------------------------------|-------------------------------------|
| <b>Strains:</b>           |                                                                                                                                                                                                                                             |                                     |
| <b><i>E. coli</i></b>     |                                                                                                                                                                                                                                             |                                     |
| DH5 $\alpha$              | <i>fhuA2</i> $\Delta$ ( <i>argF-lacZ</i> ) <i>U169 phoA glnV44</i> $\Phi$ 80 $\Delta$ ( <i>lacZ</i> ) <i>M15 gyrA96</i><br><i>recA1 relA1 endA1 thi-1 hsdR17</i>                                                                            | Life Technologies                   |
| GM2163                    | <i>dam-13::Tn 9 dcm-6 hsdR2 leuB6 his-4 thi-1 ara-14 lacY1 galK2</i><br><i>galT22 xyl-5 mtl-1 rpsL136 tonA31 tsx-78 supE44</i> McrA <sup>-</sup> McrB <sup>-</sup>                                                                          | New England Biolabs                 |
| BL21 (DE3)                | F <sup>-</sup> <i>ompT</i> [ <i>lon</i> ] <i>hsd</i> S <sub>B</sub> ( <i>r<sub>B</sub></i> <sup>-</sup> <i>m<sub>B</sub></i> <sup>-</sup> ) (an <i>E. coli</i> B strain) with DE3, a $\lambda$ prophage carrying the T7 RNA polymerase gene | Novagen                             |
| <b><i>H. volcanii</i></b> |                                                                                                                                                                                                                                             |                                     |
| H26                       | DS70 $\Delta$ <i>pyrE2</i>                                                                                                                                                                                                                  | [1]                                 |
| GZ109                     | H26 $\Delta$ <i>panA</i>                                                                                                                                                                                                                    | [2]                                 |
| GZ114                     | H26 $\Delta$ <i>psmC</i>                                                                                                                                                                                                                    | [2]                                 |
| GZ130                     | H26 $\Delta$ <i>psmA</i>                                                                                                                                                                                                                    | [2]                                 |
| GZ138                     | H26 P <sub>tnaA</sub> - <i>psmB</i>                                                                                                                                                                                                         | [2]                                 |
| <b>Plasmids:</b>          |                                                                                                                                                                                                                                             |                                     |
| pET24b                    | Km <sup>r</sup> ; <i>Eco</i> expression vector                                                                                                                                                                                              | Novagen                             |
| pJAM202                   | Ap <sup>r</sup> ; Nv <sup>r</sup> ; pBAP5010 P2 <sub>rrn</sub> - <i>psmB-his6</i> ( $\beta$ -His <sub>6</sub> ) expressed in <i>Hvo</i>                                                                                                     | [3]                                 |
| pJAM204                   | Ap <sup>r</sup> ; Nv <sup>r</sup> ; pBAP5010 P2 <sub>rrn</sub> - <i>psmA-his6</i> ( $\alpha$ 1-His <sub>6</sub> ) expressed in <i>Hvo</i>                                                                                                   | [3]                                 |
| pJAM205                   | Ap <sup>r</sup> ; Nv <sup>r</sup> ; pBAP5010 P2 <sub>rrn</sub> - <i>psmC-his6</i> ( $\alpha$ 2-His <sub>6</sub> ) expressed in <i>Hvo</i>                                                                                                   | [3]                                 |
| pJAM621                   | Km <sup>r</sup> ; pET24b <i>psmB-his6</i> ( $\beta$ -His <sub>6</sub> ) expressed in <i>Eco</i>                                                                                                                                             | [3]                                 |
| pJAM622                   | Km <sup>r</sup> ; pET24b <i>psmA-his6</i> ( $\alpha$ 1-His <sub>6</sub> ) expressed in <i>Eco</i>                                                                                                                                           | [3]                                 |
| pJAM623                   | Km <sup>r</sup> ; pET24b <i>psmC-his6</i> ( $\alpha$ 2-His <sub>6</sub> ) expressed in <i>Eco</i>                                                                                                                                           | [3]                                 |
| pJAM648                   | Ap <sup>r</sup> ; Nv <sup>r</sup> ; pBAP5010 P2 <sub>rrn</sub> - <i>panA</i> (PanA) expressed in <i>Hvo</i>                                                                                                                                 | [2]                                 |
| pJAM650                   | Ap <sup>r</sup> ; Nv <sup>r</sup> ; pBAP5010 P2 <sub>rrn</sub> - <i>panA-his6</i> (PanA-His <sub>6</sub> ) expressed in <i>Hvo</i>                                                                                                          | This study                          |
| pJAM816                   | Ap <sup>r</sup> ; Nv <sup>r</sup> ; pJAM809 P2 <sub>rrn</sub> - <i>psmB-strepII</i> ( $\beta$ -StrepII) expressed in <i>Hvo</i>                                                                                                             | [4]                                 |
| pJAM1012                  | Ap <sup>r</sup> ; Nv <sup>r</sup> ; pBAP5010 P2 <sub>rrn</sub> - <i>panB-his6</i> (PanB-His <sub>6</sub> ) expressed in <i>Hvo</i>                                                                                                          | This study                          |
| pJAM2521                  | Km <sup>r</sup> ; pET24b <i>psmA-t172g-his6</i> ( $\alpha$ 1-S58A-His <sub>6</sub> ) expressed in <i>Eco</i>                                                                                                                                | This study                          |
| pJAM2522                  | Ap <sup>r</sup> ; Nv <sup>r</sup> ; pBAP5010 P2 <sub>rrn</sub> - <i>psmA-t172g-his6</i> ( $\alpha$ 1-S58A-His <sub>6</sub> ) expressed in <i>Hvo</i>                                                                                        | This study                          |
| pJAM2523                  | Km <sup>r</sup> ; pET24b <i>psmA-a471g-his6</i> ( $\alpha$ 1-T158A-His <sub>6</sub> ) expressed in <i>Eco</i>                                                                                                                               | This study                          |
| pJAM2524                  | Ap <sup>r</sup> ; Nv <sup>r</sup> ; pBAP5010 P2 <sub>rrn</sub> - <i>psmA-a471g-his6</i> ( $\alpha$ 1-T158A-His <sub>6</sub> ) expressed in <i>Hvo</i>                                                                                       | This study                          |
| pJAM2525                  | Km <sup>r</sup> ; pET24b <i>psmC-t40g-his6</i> ( $\alpha$ 2-S14A-His <sub>6</sub> ) expressed in <i>Eco</i>                                                                                                                                 | This study                          |
| pJAM2526                  | Ap <sup>r</sup> ; Nv <sup>r</sup> ; pBAP5010 P2 <sub>rrn</sub> - <i>psmC-t40g-his6</i> ( $\alpha$ 2-S14A-His <sub>6</sub> ) expressed in <i>Hvo</i>                                                                                         | This study                          |
| pJAM2527                  | Km <sup>r</sup> ; pET24b <i>psmC-a235g-his6</i> ( $\alpha$ 2-T79A-His <sub>6</sub> ) expressed in <i>Eco</i>                                                                                                                                | This study                          |

|          |                                                                                                                                                       |            |
|----------|-------------------------------------------------------------------------------------------------------------------------------------------------------|------------|
| pJAM2528 | Ap <sup>r</sup> ; Nv <sup>r</sup> ; pBAP5010 P2 <sub>rrn</sub> - <i>psmC-a235g-his6</i> ( $\alpha$ 2-T79A-His <sub>6</sub> ) expressed in <i>Hvo</i>  | This study |
| pJAM2529 | Km <sup>r</sup> ; pET24b <i>psmB-t385g-his6</i> ( $\beta$ -S129A-His <sub>6</sub> ) expressed in <i>Eco</i>                                           | This study |
| pJAM2530 | Ap <sup>r</sup> ; Nv <sup>r</sup> ; pBAP5010 P2 <sub>rrn</sub> - <i>psmB-t385g-his6</i> ( $\beta$ -S129A-His <sub>6</sub> ) expressed in <i>Hvo</i>   | This study |
| pJAM2531 | Km <sup>r</sup> ; pET24b <i>psmB-a388g-his6</i> ( $\beta$ -T130A-His <sub>6</sub> ) expressed in <i>Eco</i>                                           | This study |
| pJAM2532 | Ap <sup>r</sup> ; Nv <sup>r</sup> ; pBAP5010 P2 <sub>rrn</sub> - <i>psmB-a388g-his6</i> ( $\beta$ -T130A-His <sub>6</sub> ) expressed in <i>Hvo</i>   | This study |
| pJAM2533 | Km <sup>r</sup> ; pET24b <i>psmA-a83t-his6</i> ( $\alpha$ 1-Y28F-His <sub>6</sub> ) expressed in <i>Eco</i>                                           | This study |
| pJAM2534 | Ap <sup>r</sup> ; Nv <sup>r</sup> ; pBAP5010 P2 <sub>rrn</sub> - <i>psmA-a83t-his6</i> ( $\alpha$ 1-Y28F-His <sub>6</sub> ) expressed in <i>Hvo</i>   | This study |
| pJAM2537 | Km <sup>r</sup> ; pET24b <i>psmC-a37g-his6</i> ( $\alpha$ 2-T13A-His <sub>6</sub> ) expressed in <i>Eco</i>                                           | This study |
| pJAM2538 | Ap <sup>r</sup> ; Nv <sup>r</sup> ; pBAP5010 P2 <sub>rrn</sub> - <i>psmC-a37g-his6</i> ( $\alpha$ 2-T13A-His <sub>6</sub> ) expressed in <i>Hvo</i>   | This study |
| pJAM2545 | Ap <sup>r</sup> ; Nv <sup>r</sup> ; pJAM816 <i>psmB-strepII psmA-his6</i> ( $\beta$ -StrepII, $\alpha$ 1-His <sub>6</sub> ) expressed in <i>Hvo</i>   | [4]        |
| pJAM2553 | Ap <sup>r</sup> ; Nv <sup>r</sup> ; pBAP5010 P2 <sub>rrn</sub> - <i>panA-t1018g</i> (PanA-S340A) expressed in <i>Hvo</i>                              | This study |
| pJAM2554 | Km <sup>r</sup> ; pET24b <i>psmA-a439g-his6</i> ( $\alpha$ 1-T147A-His <sub>6</sub> ) expressed in <i>Eco</i>                                         | This study |
| pJAM2555 | Ap <sup>r</sup> ; Nv <sup>r</sup> ; pBAP5010 P2 <sub>rrn</sub> - <i>psmA-a439g-his6</i> ( $\alpha$ 1-T147A-His <sub>6</sub> ) expressed in <i>Hvo</i> | This study |
| pJAM2558 | Ap <sup>r</sup> ; Nv <sup>r</sup> ; pJAM816 P2 <sub>rrn</sub> - <i>rio1p-strepII</i> (Rio1-StrepII) expressed in <i>Hvo</i>                           | This study |

<sup>1</sup>Eco, *E. coli*. Hvo, *H. volcanii*.

<sup>2</sup>References.

[1] Allers, T., H.P. Ngo, M. Mevarech and R.G. Lloyd. 2004. Development of additional selectable markers for the halophilic archaeon *Haloferax volcanii* based on the *leuB* and *trpA* genes. Appl. Environ. Microbiol. 70:943-953.

[2] Zhou, G., D. Kowalczyk, M.A. Humbard, S. Rohatgi and J.A. Maupin-Furrow. 2008. Proteasomal components required for cell growth and stress responses in the haloarchaeon *Haloferax volcanii*. J. Bacteriol. 190:8096-8105.

[3] Kaczowka, S.J. and J.A. Maupin-Furrow. 2003. Subunit topology of two 20S proteasomes from *Haloferax volcanii*. J. Bacteriol. 185:165-174.

[4] Humbard, M.A., G. Zhou and J.A. Maupin-Furrow. 2009. The N-terminal penultimate residue of 20S proteasome  $\alpha$ 1 influences its N $\alpha$ -acetylation and protein levels as well as growth rate and stress responses of *Haloferax volcanii*. J. Bacteriol. 191:3794-3803.

**Suppl. Table 2.** Oligonucleotide primer pairs for site-directed mutagenesis.

| <b>Mutation</b>                       | <b>Primer Sequence (5' &gt; 3')</b>                                                             |
|---------------------------------------|-------------------------------------------------------------------------------------------------|
| <i>psmA-t172g</i> ( $\alpha$ 1 S58A)  | 5'-CGGACAAGCGCTCTCGCGCGCCGCTGATGGAAC-3'<br>5'-GTTCCATCAGCGGCGCGCGAGAGCGCTTGTCCG-3'              |
| <i>psmA-a471g</i> ( $\alpha$ 1 T158A) | 5'-GACCGACCCCTCGGGCGCCCCCTACGAGTGGAAGGC-3'<br>5'-GCCTTCCACTCGTAGGGGGCGCCCGAGGGGTCGGTC-3'        |
| <i>psmA-a439g</i> ( $\alpha$ 1 T147A) | 5'-GGCGGCGTCGAAAACGGTGCGCCGCGCCTCTACGAG-3'<br>5'-CTCGTAGAGGCGCGGCGCACCGTTTTTCGACGCCGCC-3'       |
| <i>psmA-a83t</i> ( $\alpha$ 1 Y28F)   | 5'-CTCTATCAGGTCGAATTCGCTCGTGAGGCCGTC-3'<br>5'-GACGGCCTCACGAGCGAATTCGACCTGATAGAG-3'              |
| <i>psmB-t385g</i> ( $\beta$ S129A)    | 5'-AGCATGCAGGCGCTGGCGACGCTCGTCGGCAACTTC-3'<br>5'-GAAGTTGCCGACGAGCGTCGCCAGCGCCTGCATGCT-3'        |
| <i>psmB-a388g</i> ( $\beta$ T130A)    | 5'-ATGCAGGCGCTGTTCGGCGCTCGTCGGCAACTTCCTC-3'<br>5'-GAGGAAGTTGCCGACGAGCGCCGACAGCGCCTGCAT-3'       |
| <i>psmC-a37g</i> ( $\alpha$ 2 T13A)   | 5'-GCCTACGACCGCGGAGCGTCGCTTTTCTCCC-3'<br>5'-GGGAGAAAAGCGACGCTCCGCGGTCGTAGGC-3'                  |
| <i>psmC-t40g</i> ( $\alpha$ 2 S14A)   | 5'-GCCTACGACCGCGGAACGGCGCTTTTCTCCCCCGAC-3'<br>5'-GTCGGGGGAGAAAAGCGCCGTTCCGCGGTCGTAGGC-3'        |
| <i>psmC-a235g</i> ( $\alpha$ 2 T79A)  | 5'-ACGCGCTCGGCGCGGCCGCGGCCGGCCACGTCGCC-3'<br>5'-GGCGACGTGGCCGGCCGCGGCCGCGCCGAGCGCGT-3'          |
| <i>panA-t1018g</i><br>(PanA S340A)    | 5'-ACCCGGAAGATGAACGTCGCCGACGACGTGGACTTCGTC-3'<br>5'-GACGAAGTCCACGTCGTCGGCGACGTTTCATCTTCCGGGT-3' |

**Suppl. Table 3.** MS/MS analysis of Rio1p kinase fractions purified by Strep-Tactin chromatography.

| <b>Protein</b> | <b>Residue no.</b> | <b>MASCOT</b> | <b>E value</b> | <b>Sequence</b>  |
|----------------|--------------------|---------------|----------------|------------------|
| Rio1p          | 185 – 192          | 23            | 0.033          | DYLEGDPR         |
|                | 221 – 233          | 40            | 0.00072        | AGVRVPKPIAVQR    |
|                | 193 – 205          | 23            | 0.034          | FENIGHDKGQVVR    |
|                | 234 – 249          | 17            | 0.15           | NVLVMELVGVVDDRAR |

## Supplemental Figure Legends

**Suppl. Fig. 1.  $\alpha 1$  is phosphorylated at Thr147.** An  $\alpha 1$ -specific phosphopeptide was detected in purified 20S proteasomal CPs by ESI-Q-ToF with precursor ion scanning. The peptide had a Mascot score of 30 and an expect (E) of 0.001. It was a doubly charged ion ( $m/z$  479.3) mapping to a semi-tryptic fragment of  $\alpha 1$  spanning amino acid residues 137 to 149 (ALLIGGVENGpTPR). Only one amino acid, Thr147, can be phosphorylated in that peptide, and MS/MS-annotation confirmed that Thr147 was the site of phosphorylation. The MS/MS fragmentation contained 7 y-ions and 6 out of the 7 showed the characteristic neutral loss ( $-98$ ) indicative of a phosphorylation. Several other fragments ions could be assigned to internal sequencing ions of the peptide. These peak assignments bolster the MS/MS assignment. The peptide, although generated by a tryptic digest of a 20S proteasome preparation, was a semi-tryptic fragment, an internal chymotryptic-like cut on the N-terminus of the peptide. An additional scan using an error-tolerant algorithm for this phosphorylation site hit on two additional peptides; LIGGVENGpTP + 22 Da and LIGGVENGpT + 155 Da. The Mascot score for these two peptides were 50 and 58 and the E-values were 0.0006 and 0.001, respectively. The unmodified form of the peptide was also detected in the same fraction.

**Suppl. Fig. 2.  $\alpha 2$  is phosphorylated at Thr13 or Ser14.** An  $\alpha 2$ -specific phosphopeptide was detected in purified 20S proteasomal CPs by MS/MS. The phosphopeptide, which eluted from RP-HPLC at 37.9 min, was detected as a doubly charged ion ( $m/z$  558.2) by ESI-Q-ToF. The peptide had a Mascot score of 35 and an expect value (E) of  $1.4 \times 10^{-3}$ . The peptide was composed of amino acid residues 12 – 21 (GTSLFSPDGR) of  $\alpha 2$ . Unfortunately, MS/MS could not distinguish between Thr13 and Ser14 as the phosphosite. Although the MS/MS-fragmentation contained 6 unique y-ions and 3 unique b-ions, the close proximity of the phosphosite to the N-terminus of the peptide made the assignment difficult. A precursor ion scan was performed using a QQQ instrument (ABI QTRAP 4000) set to detect the neutral loss of a phosphate group. Several of the ion b-ions on the MS/MS fragmentation displayed the characteristic neutral loss ( $-98$ ) for a phosphate, but the differentiating ions, b2 vs. y8 were missing in the spectrum. Since this phosphopeptide was detected by a precursor ion scan, the unmodified peptide was not detected in the same run. However, subsequent experiments have detected the unmodified form of this peptide.

**Suppl. Fig. 3. PAN-A is phosphorylated at Ser340.** A PAN-A-specific phosphopeptide was reproducibly detected by ESI-QTOF analysis of tryptic digestions of PAN-A purified from *H. volcanii* strains. The phosphopeptide eluted from RP-HPLC at 69.05 min as a quadrupoly charged ion ( $m/z$  684.8, 4+) and was composed of amino acid residues 337 to 361 of PAN-A (MNVpSDDVDFVELAEMADNASGADIK). MS/MS fragmentation confirmed that Ser340 was the phosphorylated amino acid. Despite the large, 25-amino acid peptide, a high Mascot score (70) and low expect value ( $1.4 \times 10^{-7}$ ) were obtained due to the assignment of 9 y-ions and 6 b-ions in the MS/MS fragmentation. Additional peaks were assigned that increased the confidence of this peptide including a neutral loss peak ( $-98$  for phosphorylation) and several internal fragmentation ions. The unmodified peptide was detected in the same preparations.

**Suppl. Fig. 4.  $\alpha 1$  is methylesterified on acidic residues Asp 20 (A), Glu 27 (B), Glu62 (C), Glu 112 (D) and Glu161 (E).** Five unique methylated peptides were identified in several ESI-QTOF experiments of tryptic digestions of 20S proteasomes purified from *H. volcanii* DS70 strain cells. Each methylated peptide was specific for the  $\alpha 1$  protein. The peptides mapped to amino acid residue numbers 13 to 22 (GITIFSPD<sub>methyl</sub>GR), 23 to 30 (LYQVE<sub>methyl</sub>YAR), 58 to 68 (SPLME<sub>methyl</sub>PTSVEK), 105 to 116 (YGEPiGIE<sub>methyl</sub>TLTK) and 150 to 163 (LYETDPSGTPYE<sub>methyl</sub>WK). All five peptides eluted from the RP-HPLC as doubly charged ions: 538.77 (m/z), 528.23 (m/z), 616.28 (m/z), 667.82 (m/z) and 567.23 (m/z), with Mascot scores above 33 (up to 66) and E values from 2.5e-5 to 0.032. The high Mascot scores and corresponding low E-values validate the assignment of the peptides and the methylation sites. Several of the MS/MS-fragmentations also showed neutral losses of methyl groups (-14). Specifically, peptides 23 – 30 and 105 – 116 had three neutral loss peaks and the 58 – 68 peptide had one neutral loss peak. The MS/MS fragmentation was complete enough in all 5 spectra to definitively assign the location of the methylation.

**Suppl. Fig. 1.**  $\alpha 1$  is phosphorylated at Thr147.

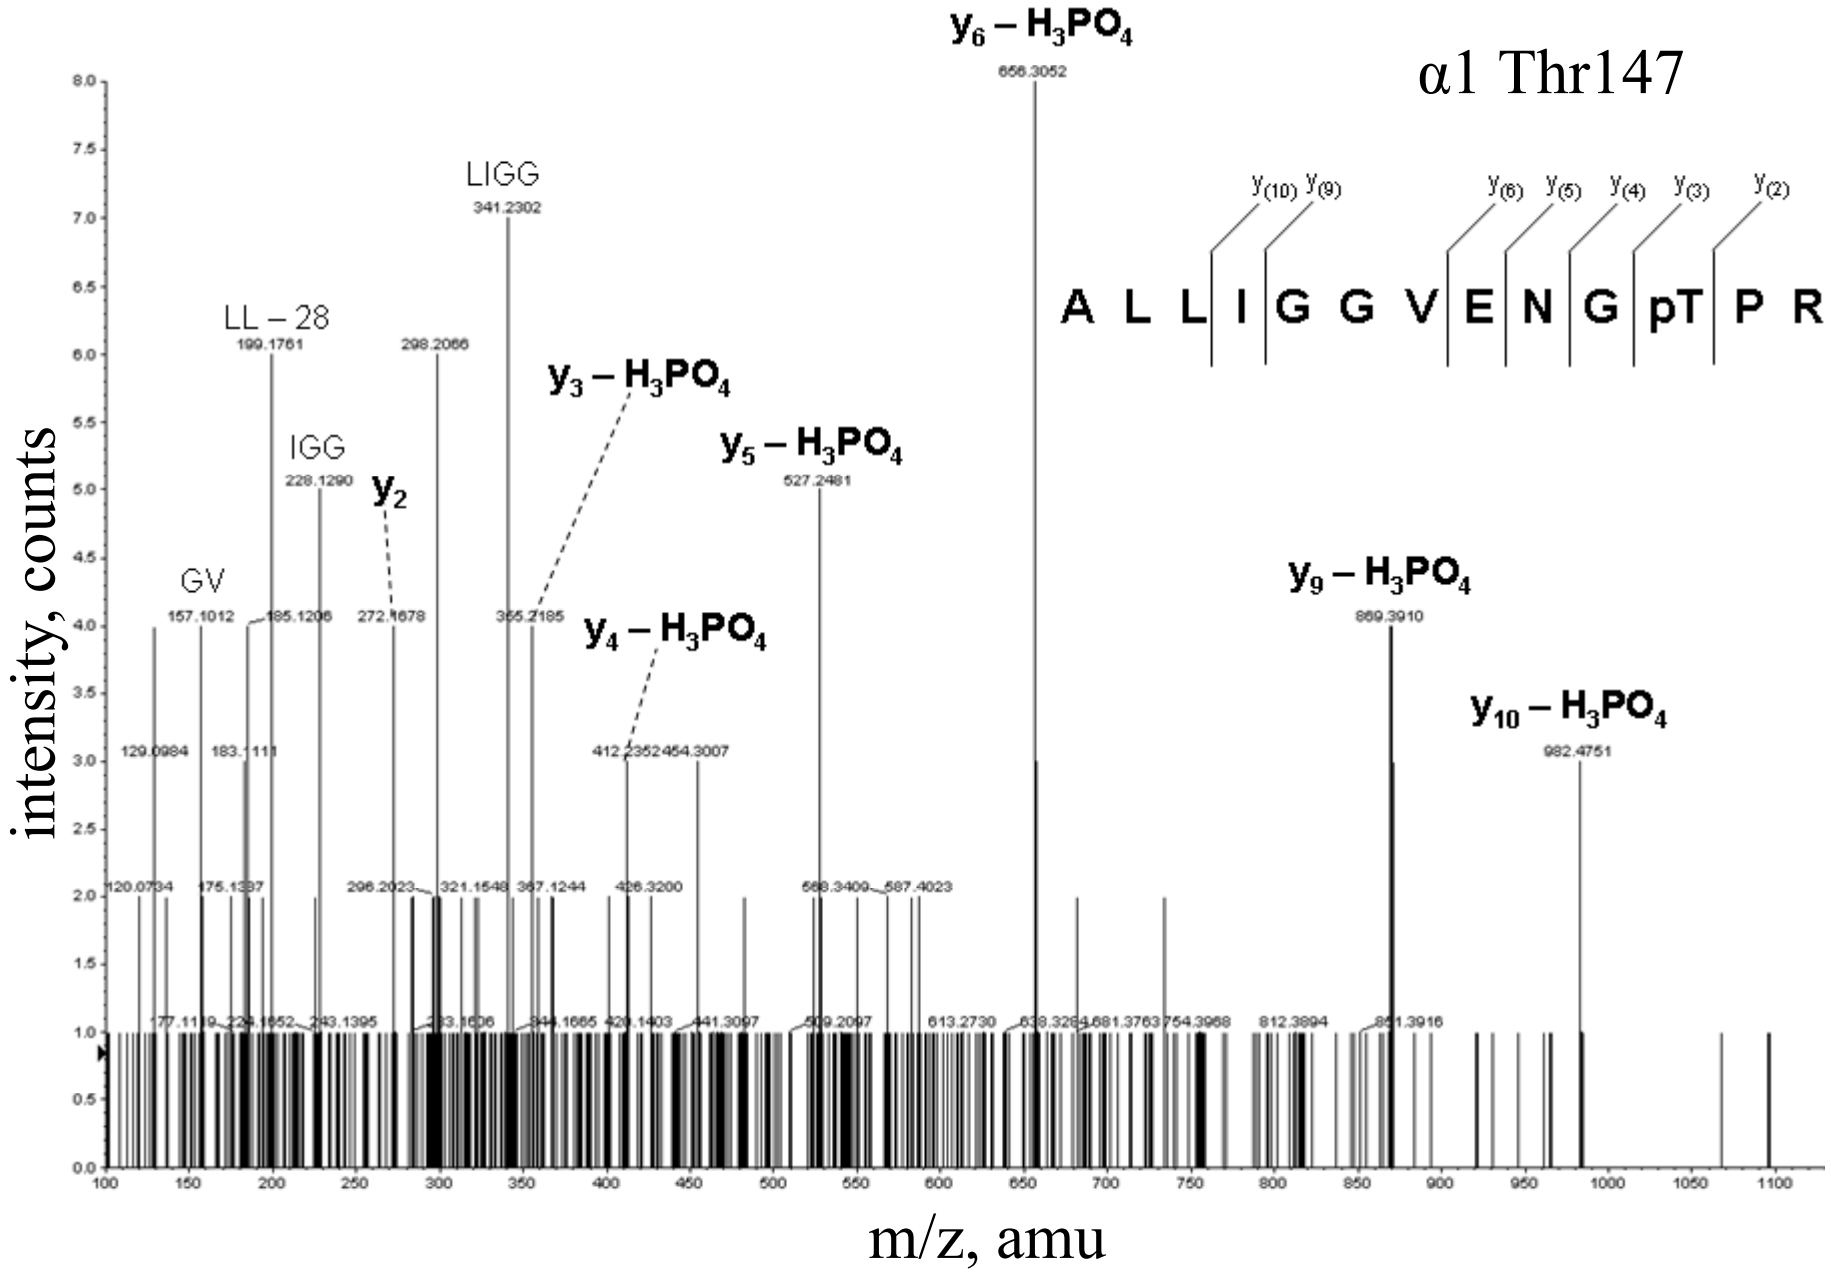

**Suppl. Fig. 2.**  $\alpha 2$  is phosphorylated at Thr13 or Ser14.

$\alpha 2$  Thr13/Ser14

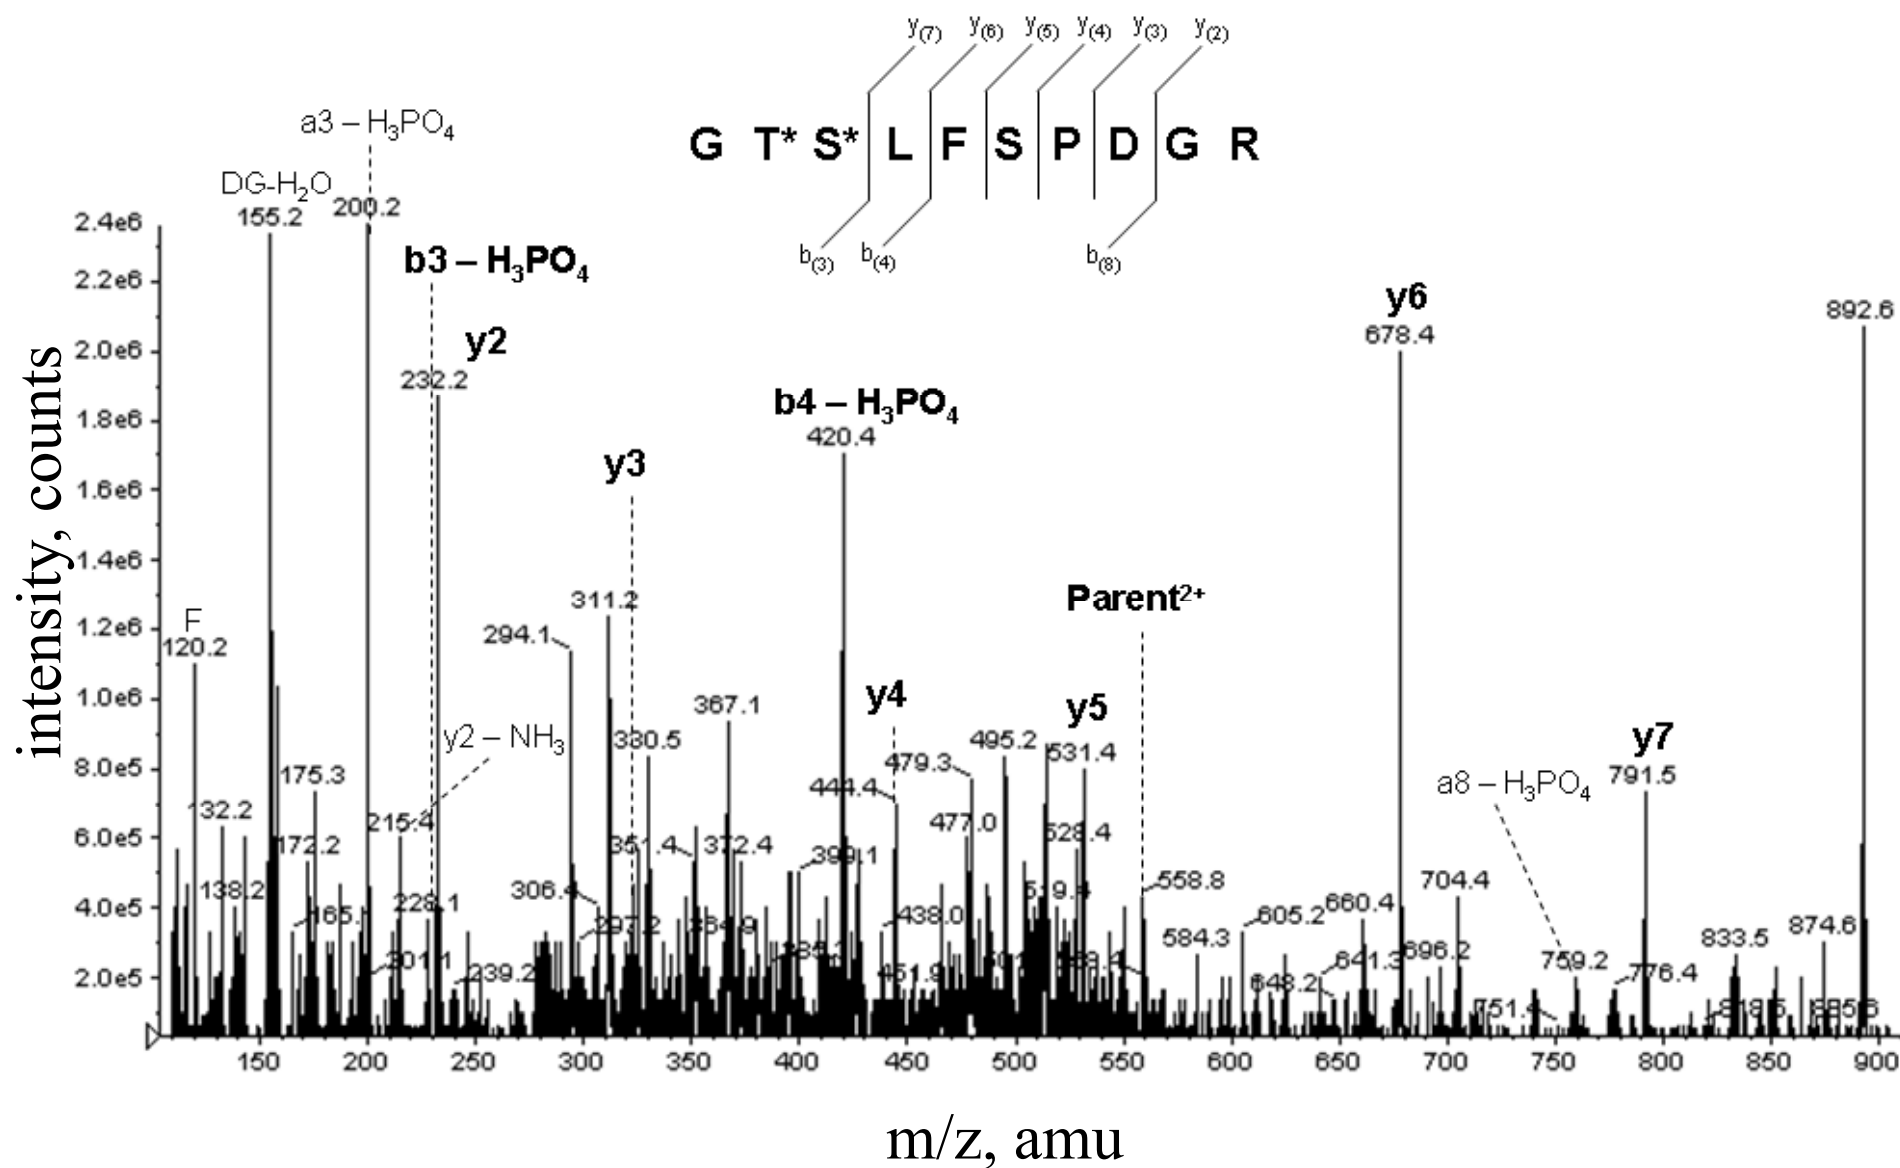



**Suppl. Fig. 3.** PanA is phosphorylated at Ser340.

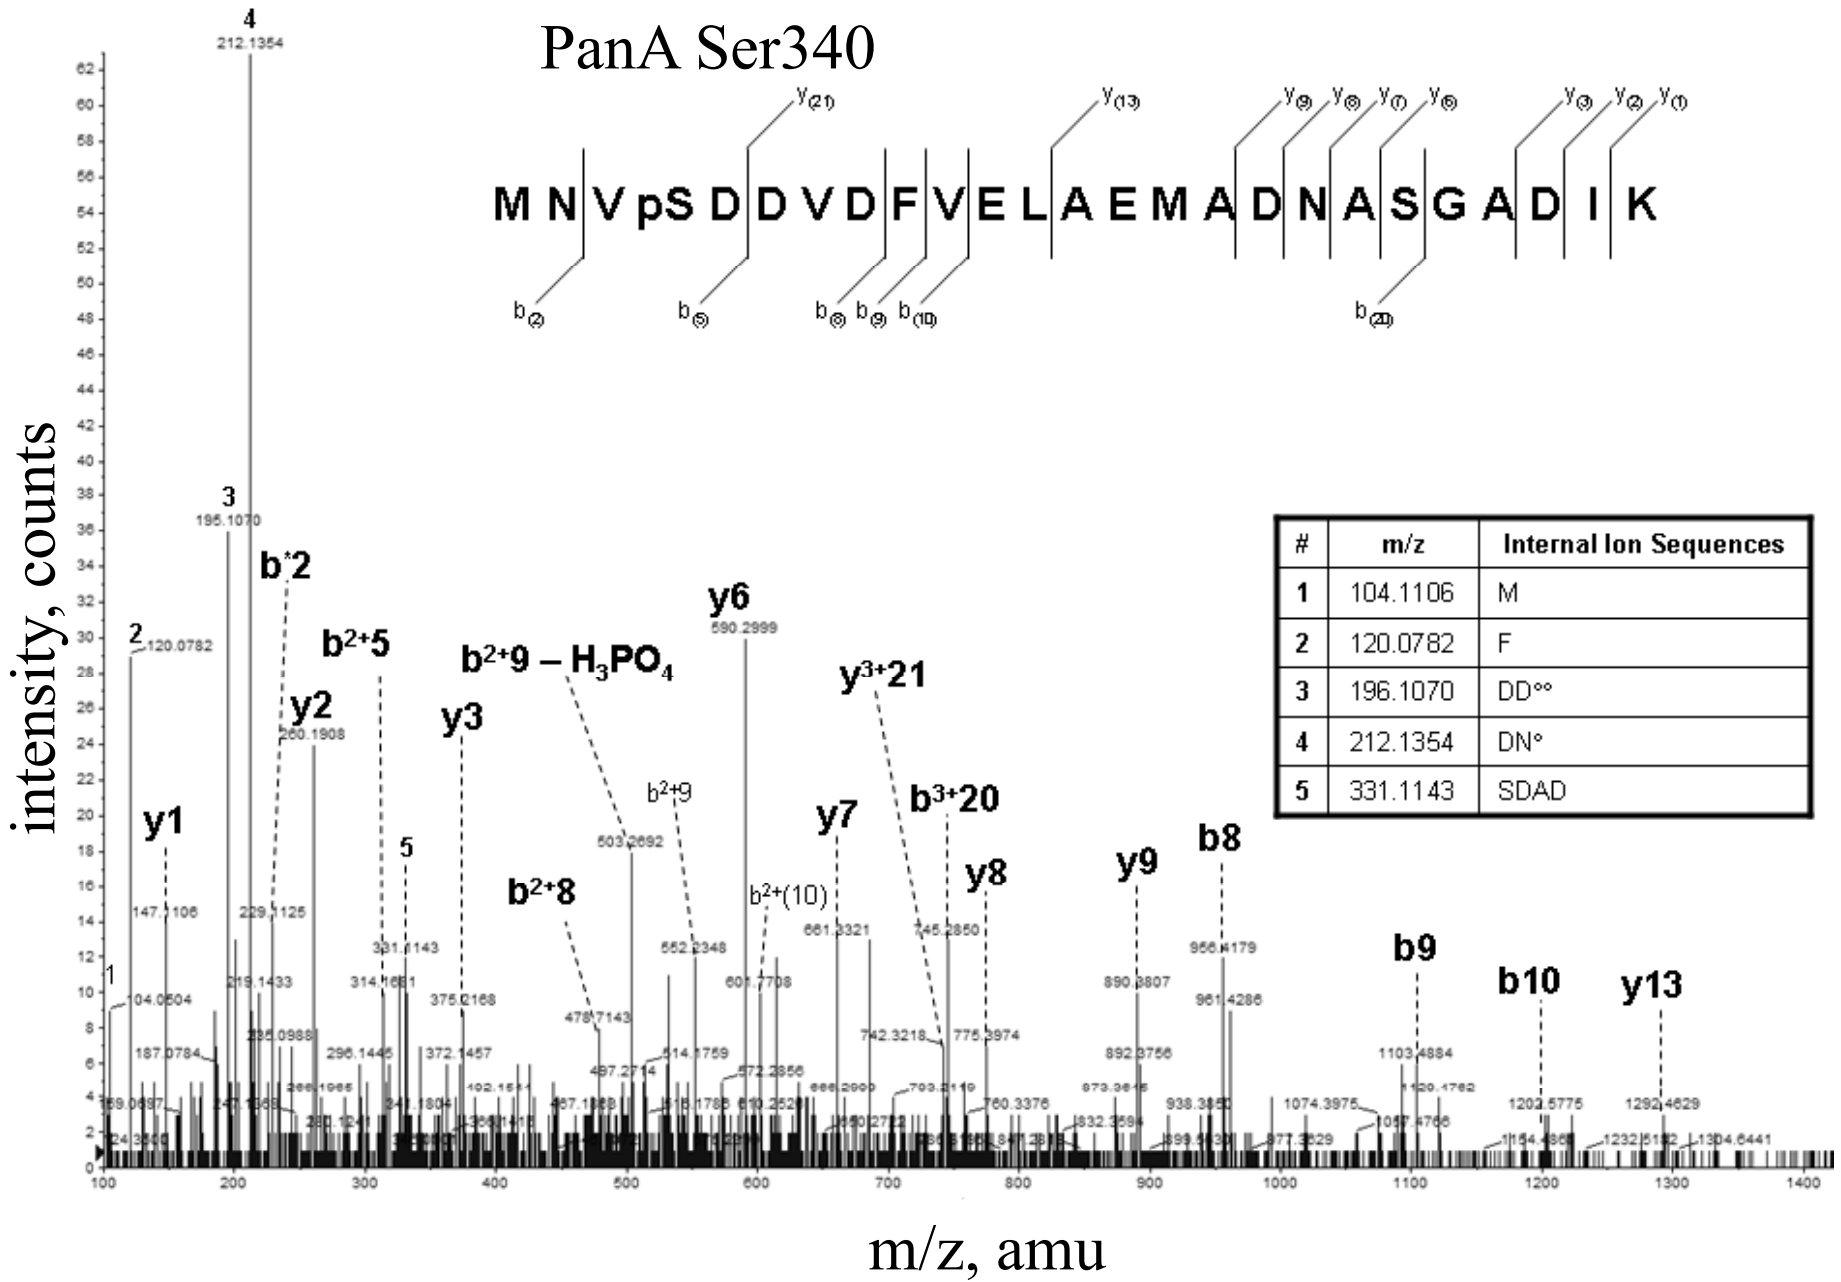

**Suppl. Fig. 4.**  $\alpha 1$  is methylesterified on acidic residues.

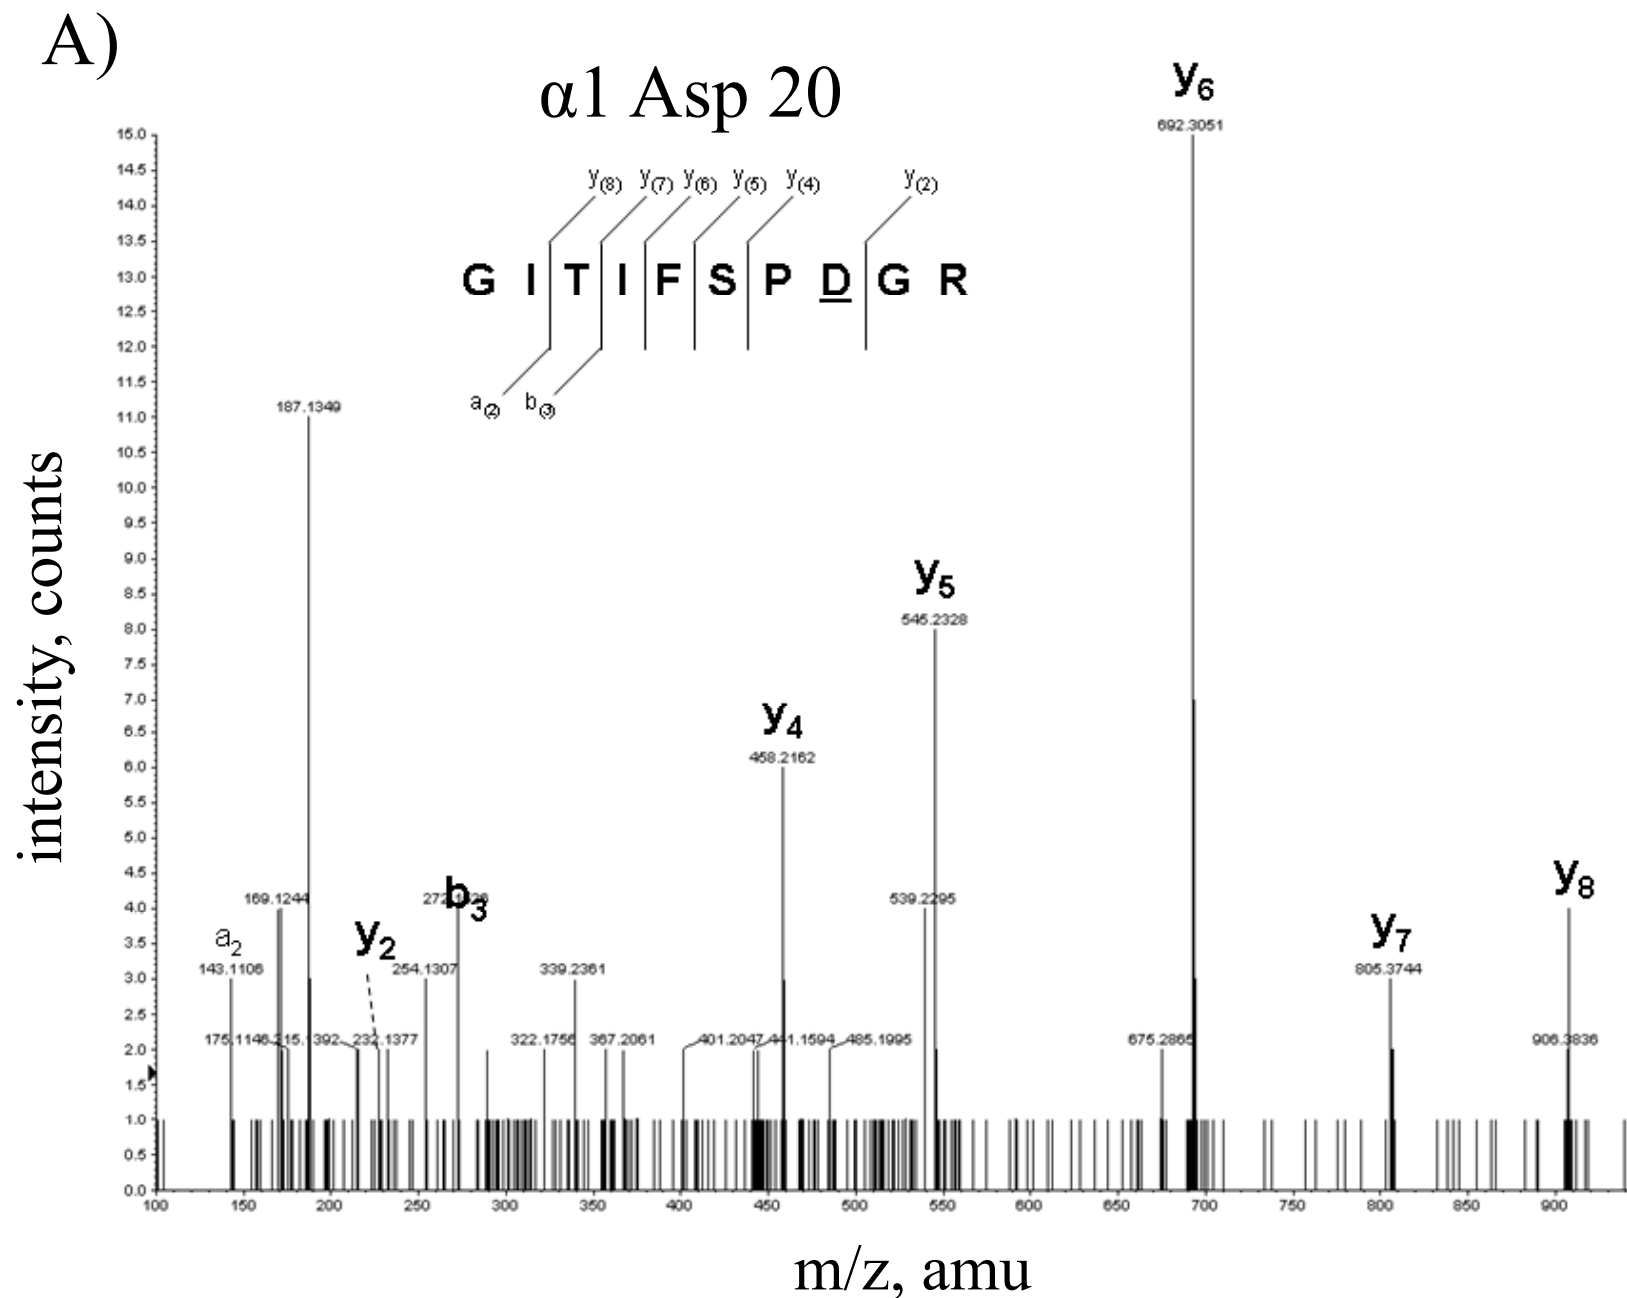

**Suppl. Fig. 4.**  $\alpha 1$  is methylesterified on acidic residues.

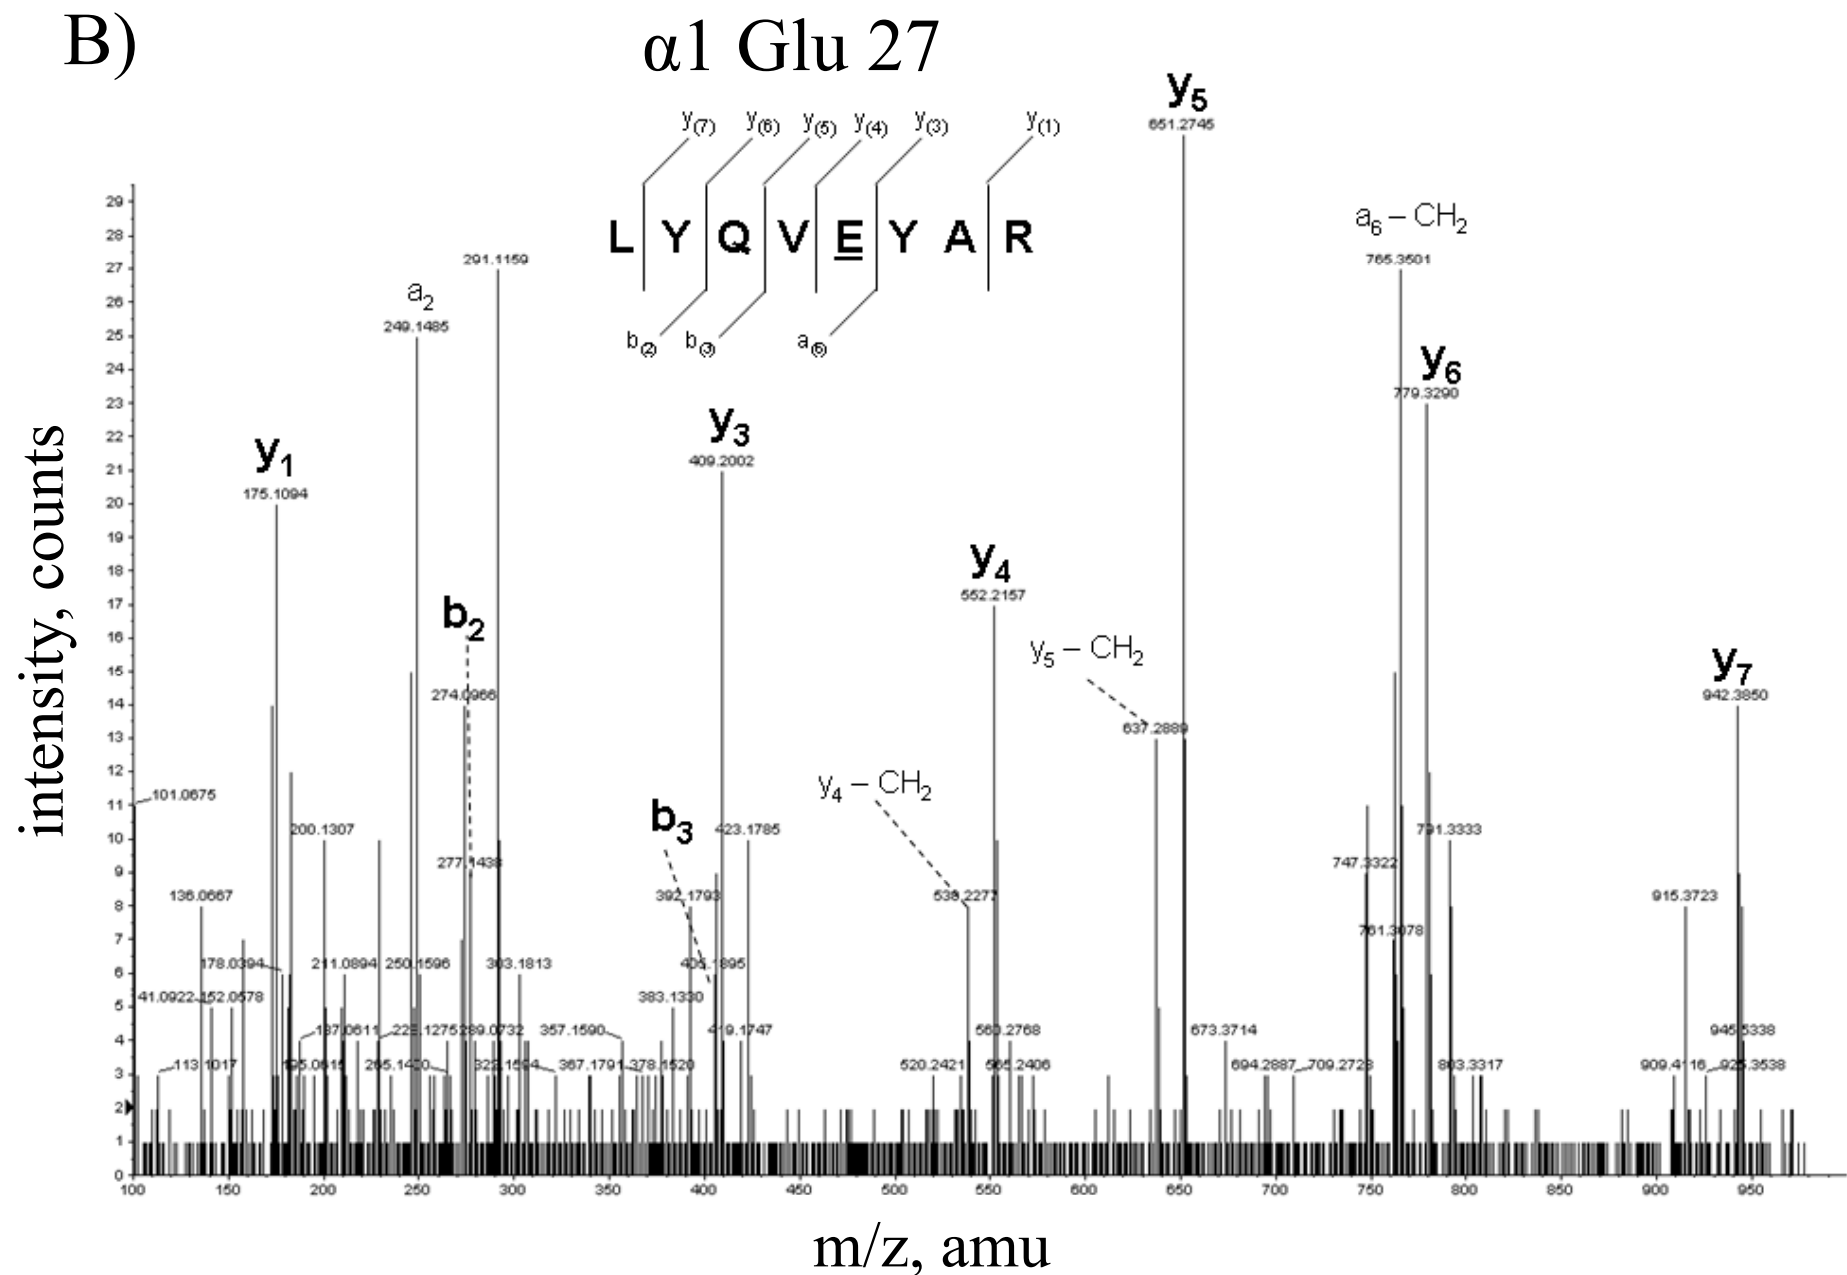

**Suppl. Fig. 4.**  $\alpha 1$  is methylesterified on acidic residues.

C)

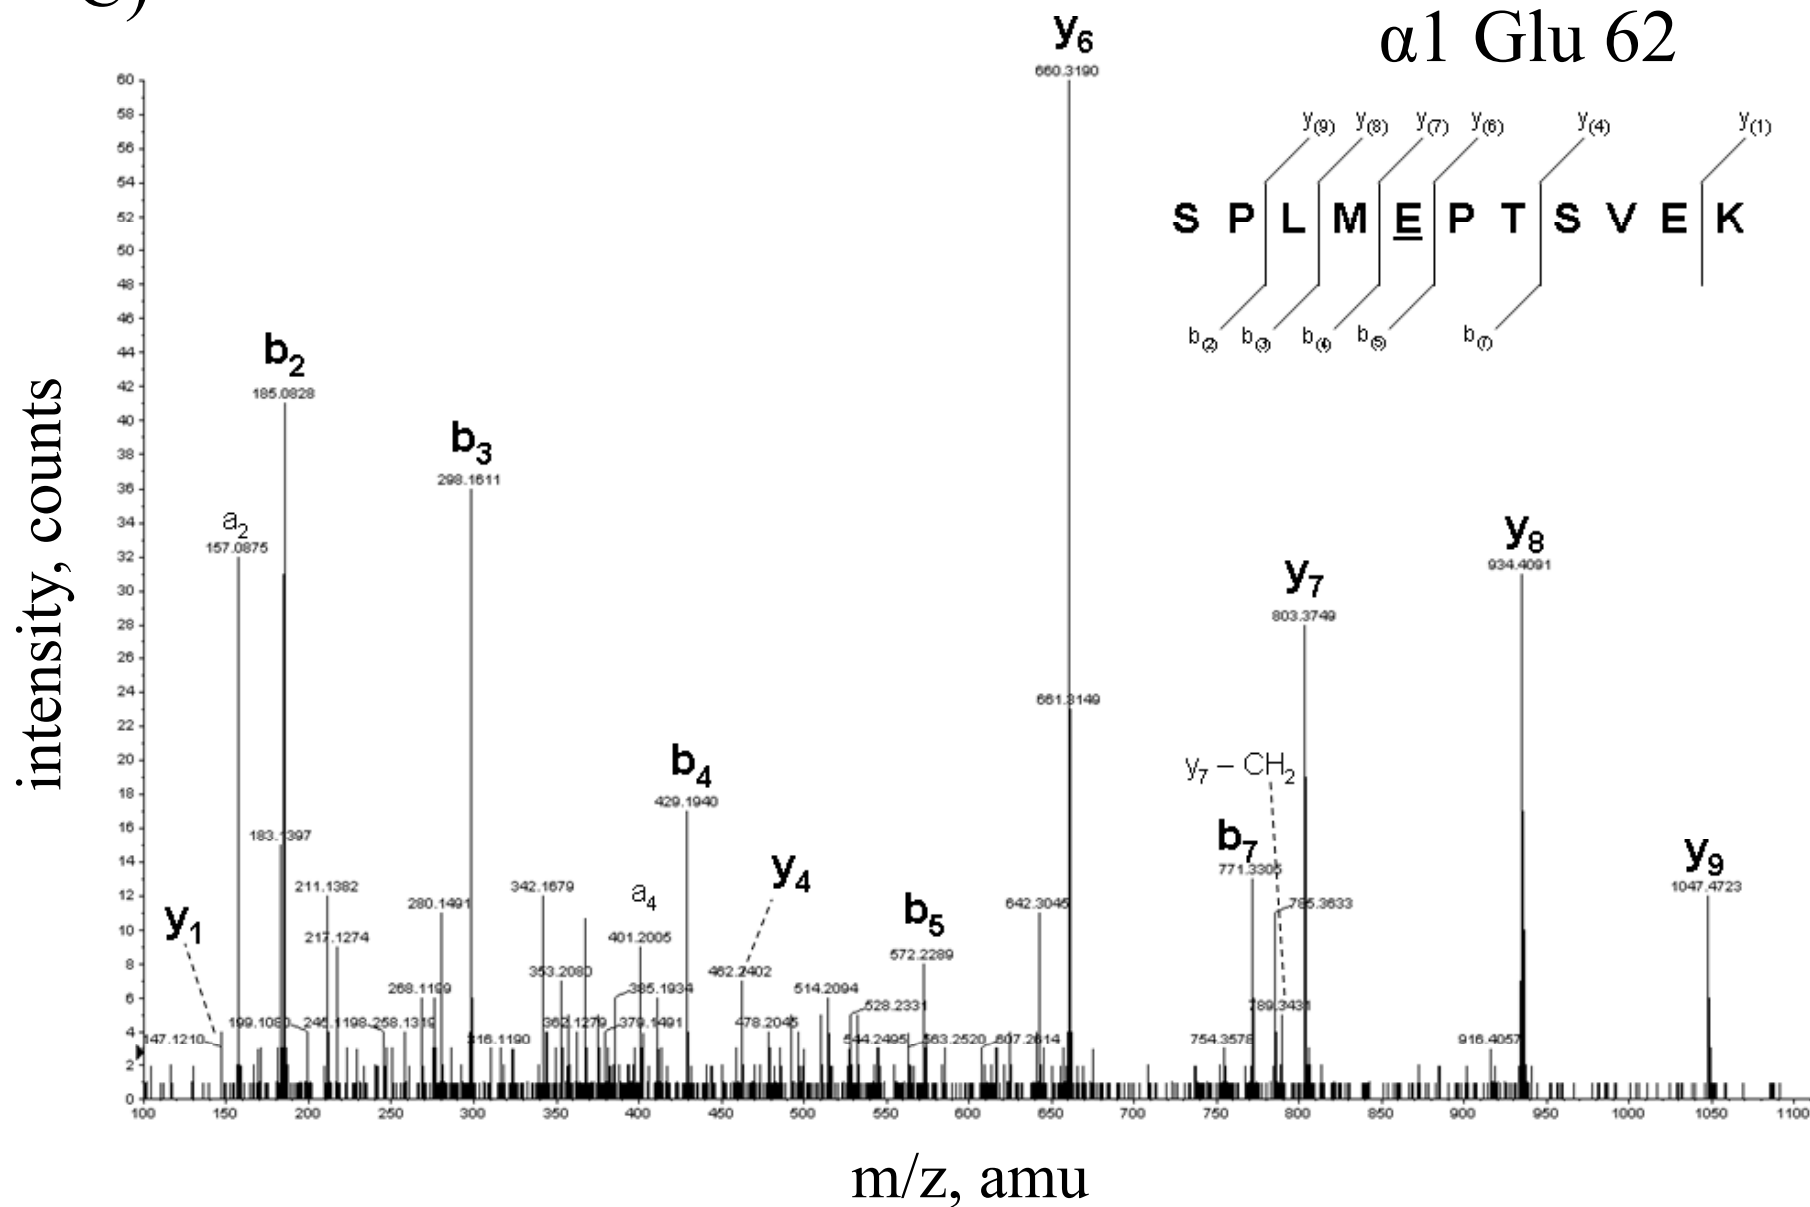

**Suppl. Fig. 4.  $\alpha 1$  is methylesterified on acidic residues.**

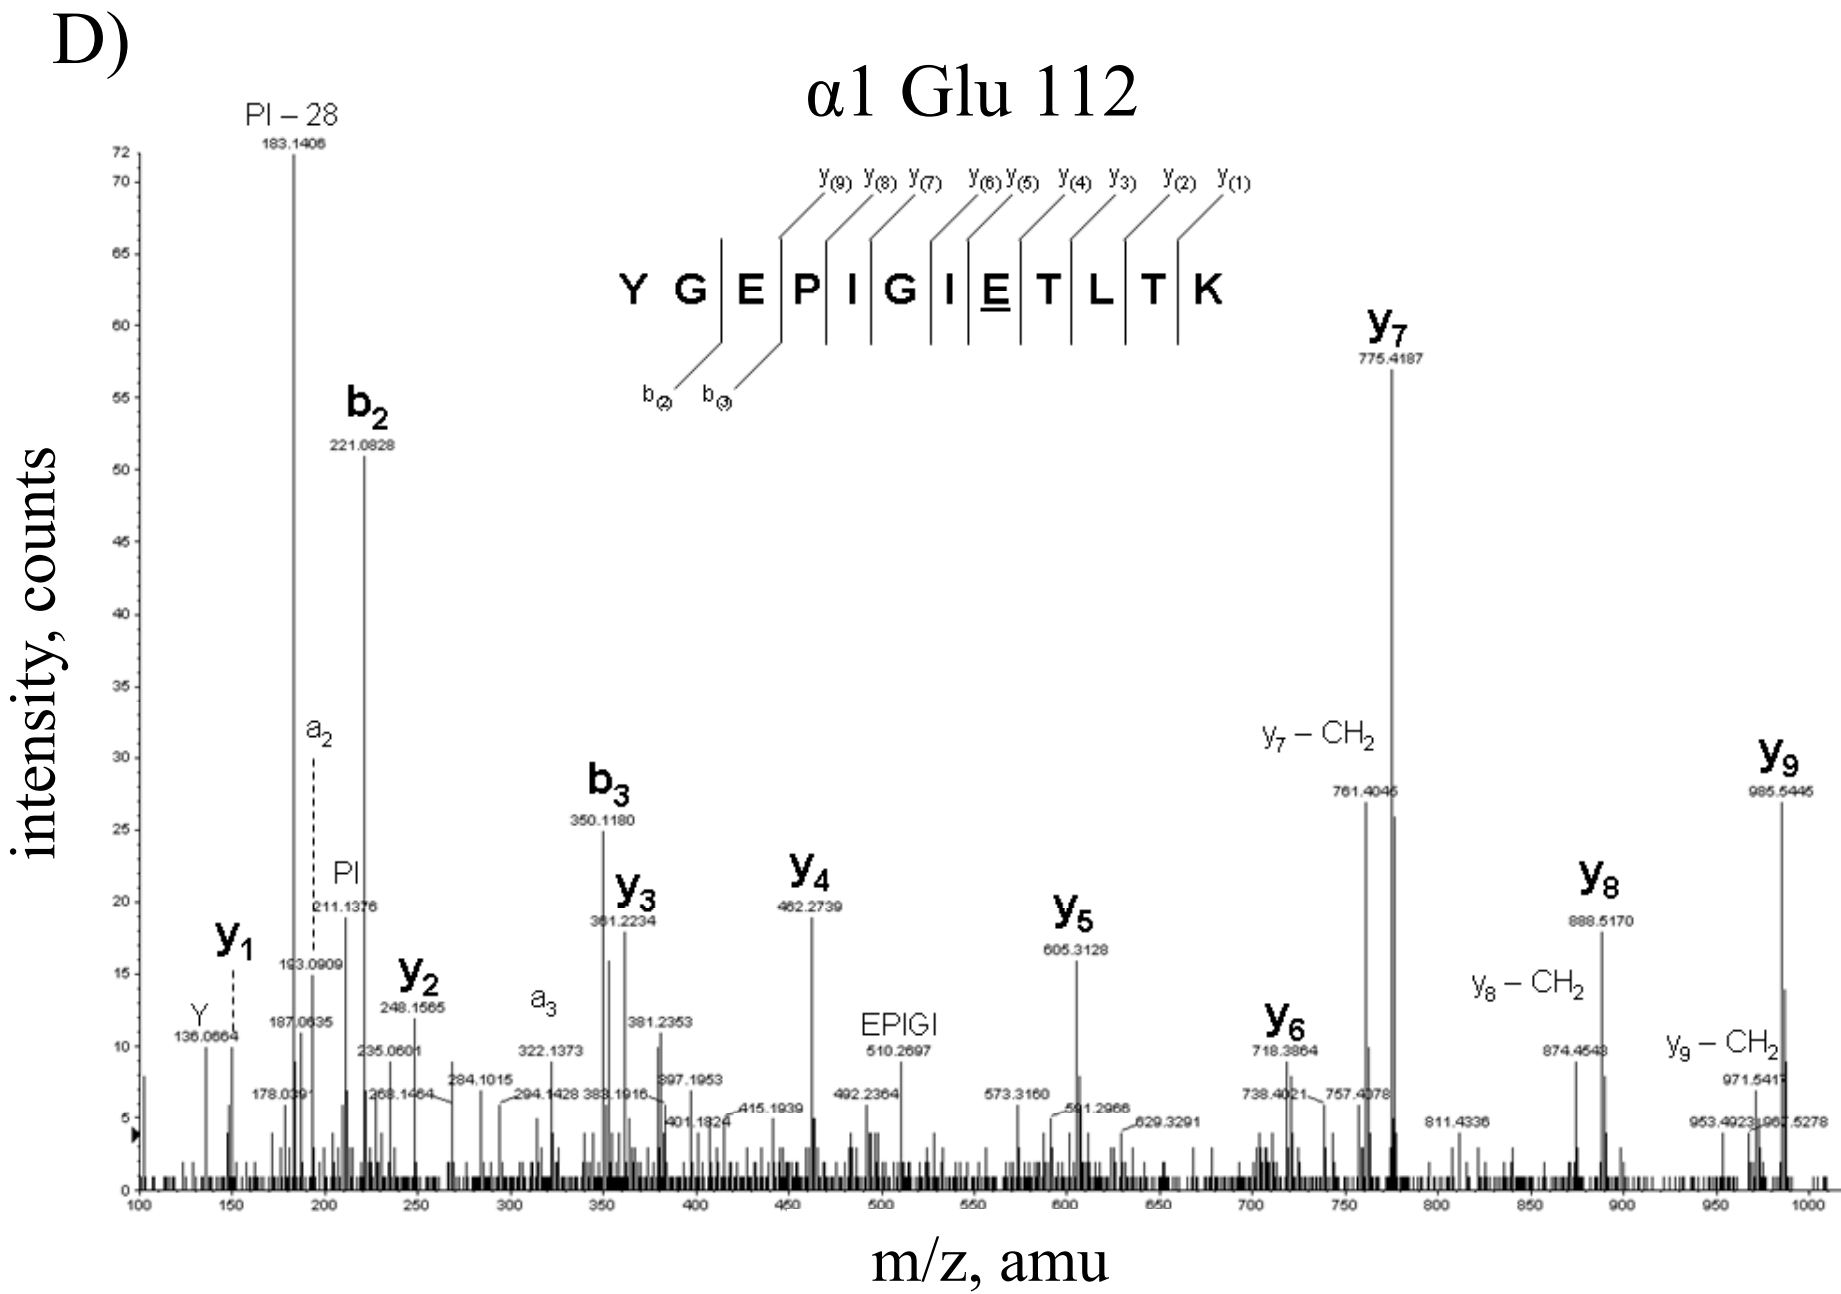

**Suppl. Fig. 4.**  $\alpha 1$  is methylesterified on acidic residues.

E)

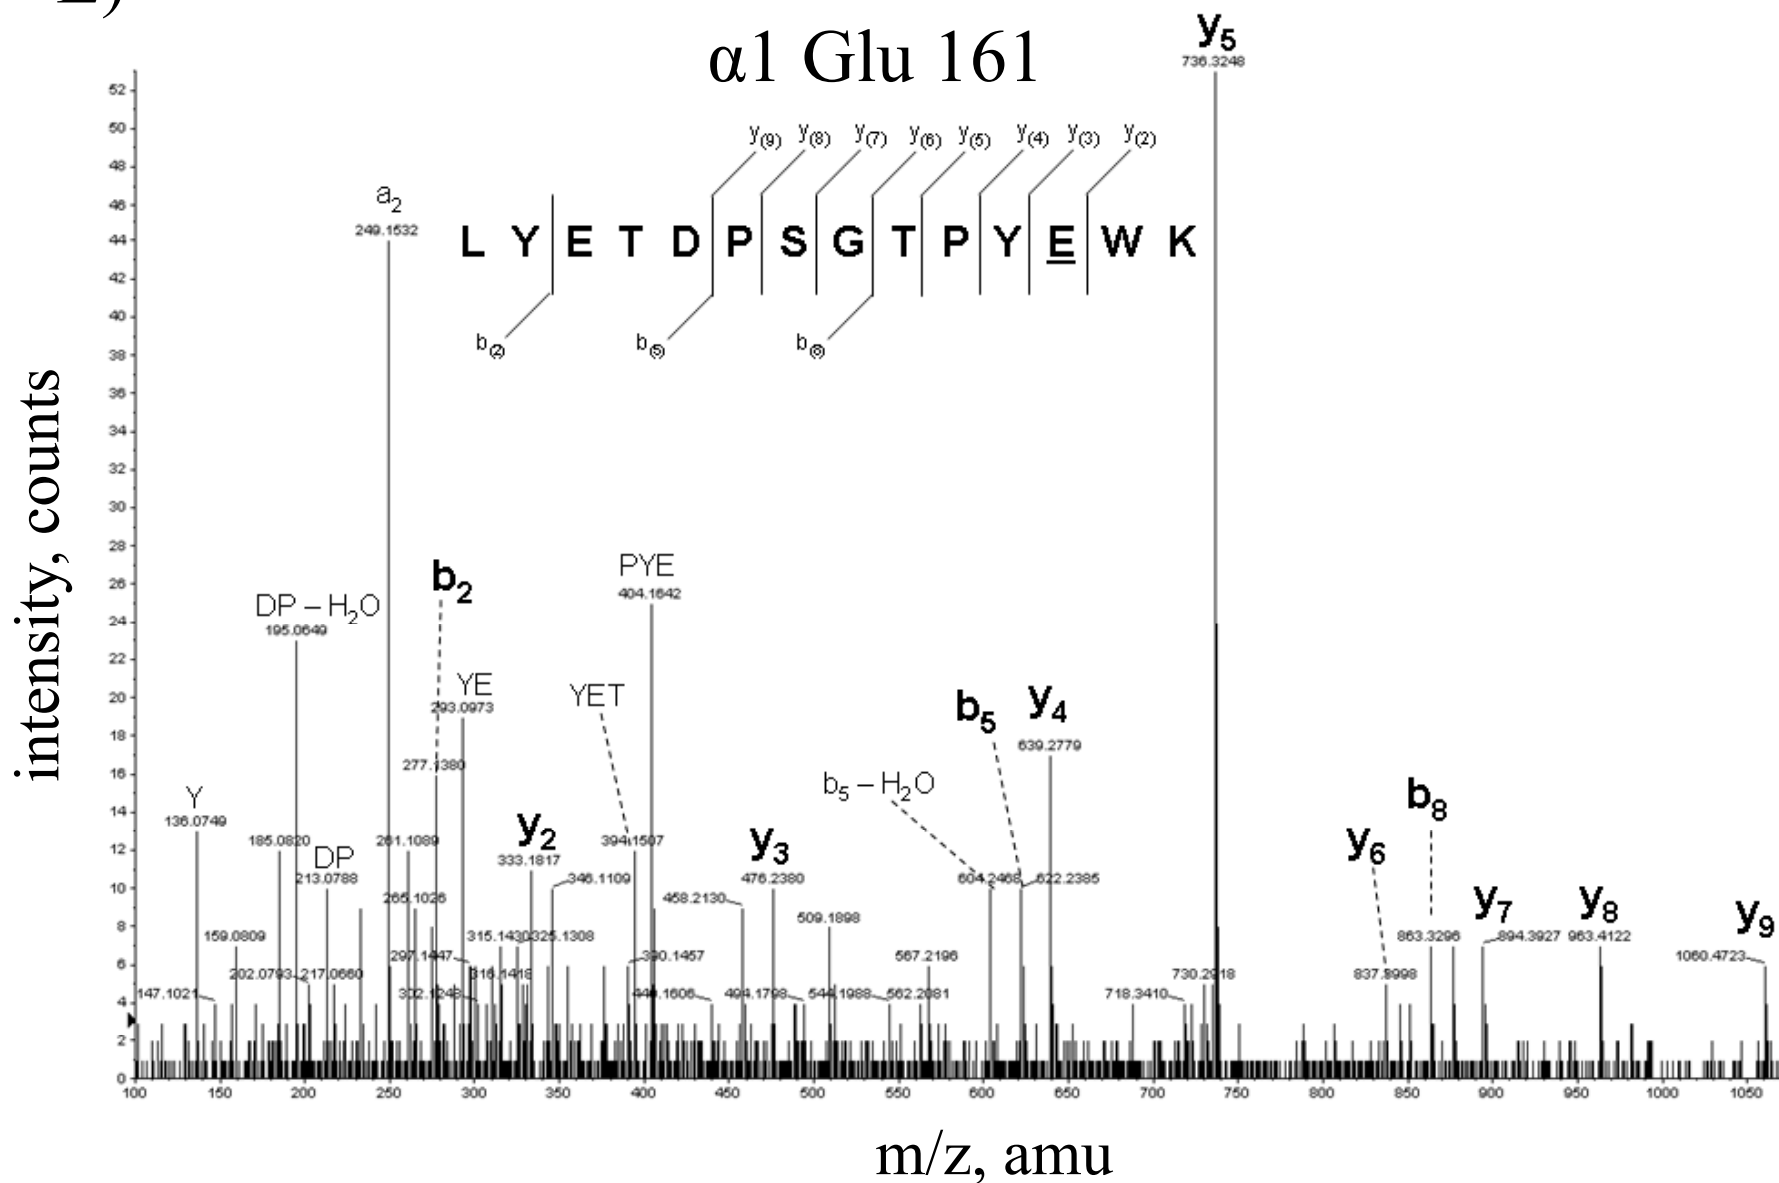

Supplement: f1 [file 481725.f1.pdf]
